# Supplementary material for: A freezing-tolerant superior proton conductive hydrogel comprised of sulfonated poly(ether–ether–ketone) and poly(vinyl-alcohol) as a quasi-solid-state electrolyte in a proton battery
Source: Royal Society of Chemistry journal article supplement (doi:10.1039/d3tc02665e), 2023-01-01
Supplement: d3tc02665e1.pdf [file d3tc02665e1.pdf]

# **A Freezing-Tolerant Superior Proton Conductive Hydrogel Comprised of Sulfonated Poly(ether-ether-ketone) and Poly(vinyl-alcohol) as Quasi-Solid-State Electrolyte in Proton Battery**

Hao Dong,<sup>a</sup> Lin-Lin Wang,<sup>a</sup> Zhi-Rong Feng,<sup>a</sup> Jie Song,<sup>b</sup> Qiao Qiao,<sup>\*a,b</sup> Yu-Ping Wu,<sup>b</sup> and Xiao-Ming Ren<sup>\*a,c</sup>

<sup>a</sup> College of Chemistry and Molecular Engineering, Nanjing Tech University, Nanjing 211816, P. R. China

<sup>b</sup> School of Energy Science and Engineering, Nanjing Tech University, Nanjing 211816, P. R. China

<sup>c</sup> State Key Laboratory of Coordination Chemistry, Nanjing University, Nanjing 210023, P. R. China

## Table of Contents

### Section 1

Synthesis of nickel ferrocyanide (Ni-PBA) and molybdenum (VI) oxide ( $\text{MoO}_3$ )

### Section 2

Figure S1-S8

Table S1-S5

Reference

## Section 1

### Synthesis of nickel ferrocyanide (Ni-PBA) and molybdenum (VI) oxide (MoO<sub>3</sub>)

The synthesis of Ni-PBA was based on a co-precipitation reaction in an aqueous solution.<sup>1</sup> In a typical procedure, 3 mmol K<sub>4</sub>Fe(CN)<sub>6</sub>·3H<sub>2</sub>O and 0.16 mol KCl were dissolved in 150 mL deionized water under stirring to obtain a solution A. The green NiCl<sub>2</sub> solution (150 mL 0.04 mol L<sup>-1</sup>) was added dropwise into solution A under vigorously stirring at 70°C. After 6 hours of reaction, the gray-green precipitates were washed and centrifuged with deionized water and ethanol for multiple times and then vacuum-dried overnight at 60 °C.

α-MoO<sub>3</sub> was synthesized via a modified hydrothermal method.<sup>2</sup> Typically, 1.0 g (NH<sub>4</sub>)<sub>6</sub>Mo<sub>7</sub>O<sub>24</sub>·4H<sub>2</sub>O was dissolved in 30 mL DI water, then 10 mL HNO<sub>3</sub> solution (3 M) was added to adjust the pH. After stirring for 20 min, the transparent colorless solution was transferred into a Teflon-lined autoclave and heated at 180 °C for 24 hours. The white precipitate was obtained by centrifugation and washed with DI water and ethanol for several times, and then vacuum-dried overnight at 60 °C.

## Section 2

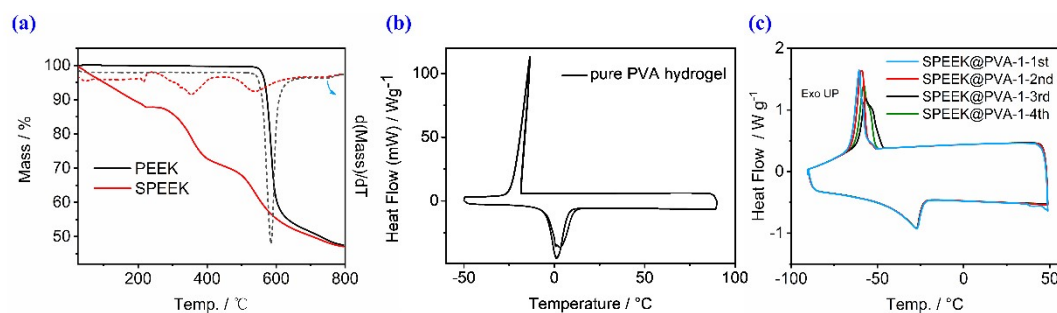

Figure S1. (a) TG plots and their first derivative curves of PEEK and SPEEK, DSC curves of (b) pure PVA hydrogel and (c) SPEEK@PVA-1 hydrogel.

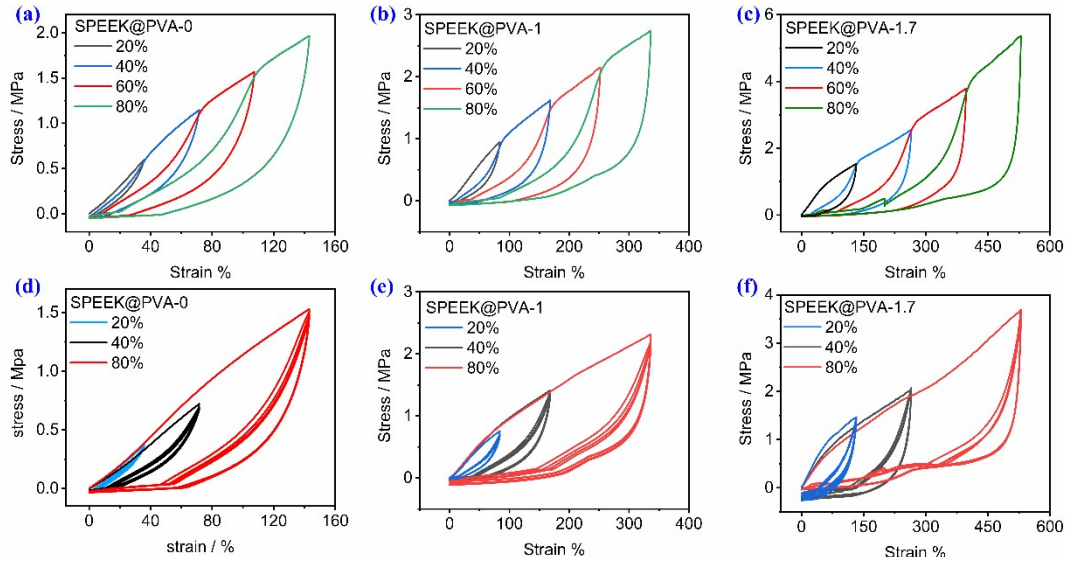

Figure S2. Successive tensile loading–unloading curves which were done sequentially at 20%, 40%, 60% and 80% of maximum strain at room temperature for SPEEK@PVA-X hydrogels (a)  $X = 0$ , (b)  $X = 1$  and (c)  $X = 1.7$ . Tensile loading–unloading curves at 20%, 40% and 80% of maximum strain at room temperature for SPEEK@PVA-X hydrogels (d)  $X = 0$ , (e)  $X = 1$  and (f)  $X = 1.7$ , and five successive cyclic processes of tensile loading–unloading were performed at each strain.

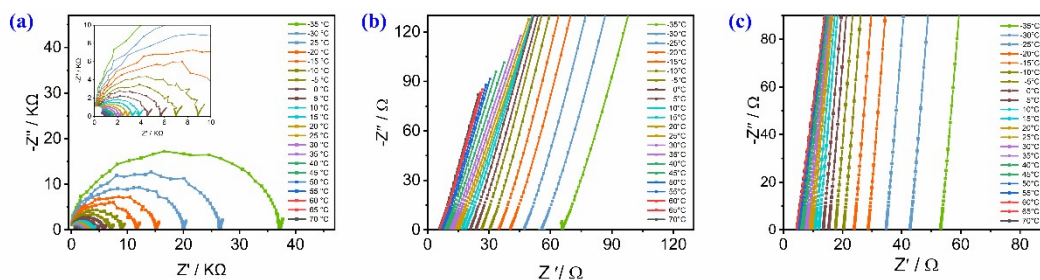

Figure S3. Temperature-dependent Nyquist plots of SPEEK@PVA-X hydrogels. (a)  $X = 0$ , (b)  $X = 1$  and (c)  $X = 1.7$ .

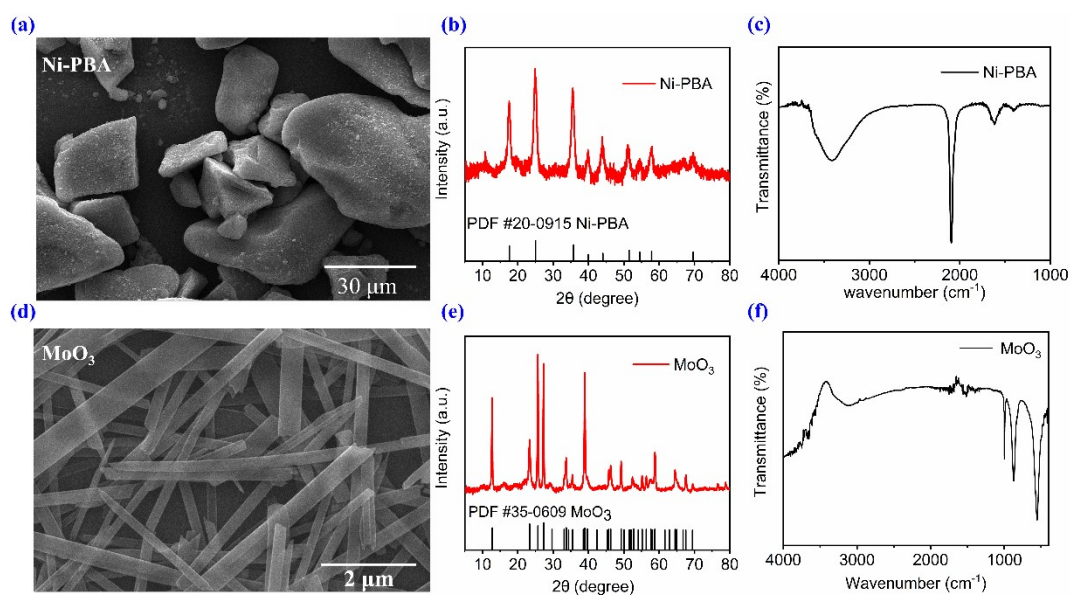

Figure S4. SEM images (a, d), PXRD patterns (b, e) and FT-IR spectra (c, f) for Ni-PBA and  $\text{MoO}_3$ . Ni-PBA was prepared by a precipitation reaction in an aqueous solution, the intense diffraction peaks in PXRD pattern of Ni-PBA, appeared in the  $2\theta$  range of  $5\text{--}50^\circ$ , correspond to the (2 0 0), (2 2 0), (4 0 0), (4 4 0) and (6 2 0) crystallographic plane reflections, and are good consistent with the standard PXRD card (JCPDS no. 20-0915). The intense band at  $2088\text{ cm}^{-1}$  in FT-IR spectrum is the characteristic band of  $\nu(\text{C}\equiv\text{N})$  related to cyanide-coordinated  $\text{Fe}^{2+}$ , the vibration band at  $3375\text{ cm}^{-1}$  arises from H-O stretching of interstitial water in Ni-PBA. The  $\text{MoO}_3$  was synthesized via a modified hydrothermal method, the as-prepared nanobelt  $\text{MoO}_3$  has a stable layered orthorhombic structure according to PXRD card (JCPDS no. 35-0609). The band at  $996\text{ cm}^{-1}$  in FT-IR spectrum of nanobelt  $\text{MoO}_3$  was associated with the terminal  $\nu(\text{Mo}=\text{O})$ , which was an indication of layered  $\text{MoO}_3$  phase. The bands at  $867\text{ cm}^{-1}$  and  $558\text{ cm}^{-1}$  are assigned to the  $\text{Mo}^{6+}$  stretching vibrations and bending vibrations of the Mo-O-Mo units.

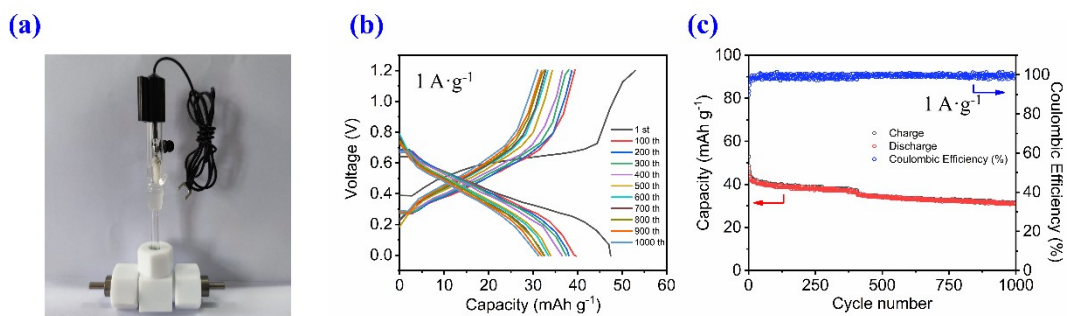

Figure S5. Electrochemical performance of proton battery with Ni-PBA and Pt electrode and SPEEK@PVA-1.7 hydrogel electrolyte. (a) Photograph of Swagelok cell (b) GCD curves and (c) Cycling and coulombic performance at a current of  $1 \text{ A g}^{-1}$  during 1000 cycles.

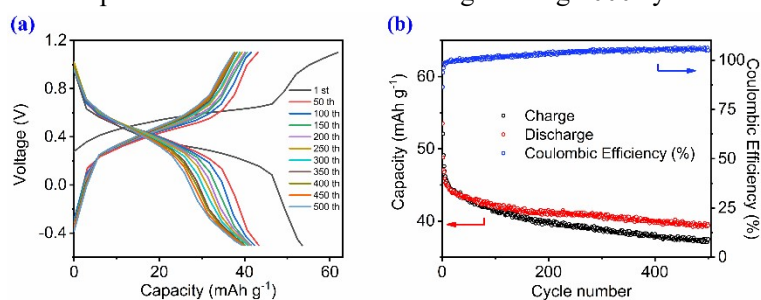

Figure S6. Electrochemical performance of full proton battery with  $1 \text{ M H}_2\text{SO}_4$  electrolyte. (a) GCD curves and (b) Cycling and coulombic performance at a current of  $1 \text{ A g}^{-1}$  during 500 cycles.

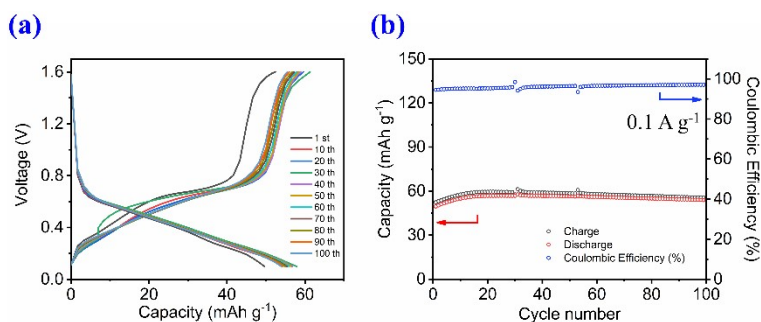

Figure S7. Electrochemical performance of full proton battery with SPEEK@PVA-1.7 hydrogel electrolyte under  $-20 \text{ }^\circ\text{C}$ . (a) GCD curves and (b) Cycling and coulombic performance at a current of  $0.1 \text{ A g}^{-1}$  during 100 cycles.

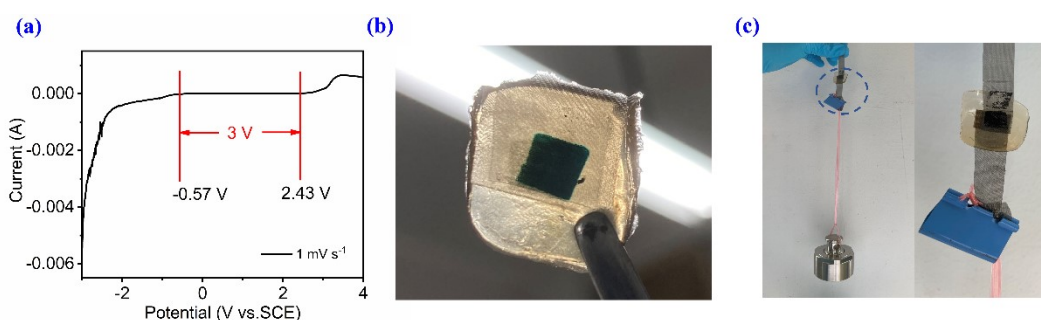

Figure S8. (a) LSV curves of SPEEK@PVA-1.7 hydrogel at the scan rate of  $1 \text{ mV s}^{-1}$ . (b) Photograph of SPEEK@PVA-1.7 hydrogel after charging-discharging 500 cycles at a current of  $1 \text{ A g}^{-1}$ . (c) Photograph of super-adhesive properties of the electrode-hydrogel interface (load weight is 425 g).

Table S1. The position of the absorption peak of each group in PEEK, SPEEK, and the corresponding vibration mode of the infrared spectrum.<sup>3-5</sup>

|       | Wavenumber / $\text{cm}^{-1}$ | Group | Mode of vibration |
|-------|-------------------------------|-------|-------------------|
| PEEK  | 1646                          | C=O   | v                 |
|       | 1487                          | C-C   | v                 |
| SPEEK | 1642                          | C=O   | v                 |
|       | 1501                          | C-C   | v                 |
|       | 1468                          | C-C   | v                 |
|       | 1250                          | O=S=O | $v_{\text{as}}$   |
|       | 1075                          | O=S=O | $v_{\text{s}}$    |
|       | 708                           | S-O   | v                 |

Table S2.  $^1\text{H}$  NMR spectrum of chemical shifts and integral areas of H at different positions.<sup>5,6</sup>

| chemical shift (ppm) | H position    | Integral area |
|----------------------|---------------|---------------|
| 7.00-7.07            | 4, 6          | 2.00          |
| 7.07-7.15            | 13'           | 1.17          |
| 7.15-7.20            | 15, 19        | 2.10          |
| 7.20-7.26            | 12'           | 1.09          |
| 7.26-7.30            | 9, 10, 12, 13 | 0.24          |
| 7.49-7.54            | 10'           | 1             |
| 7.77-7.80            | 16, 18        | 2.09          |
| 7.80-7.88            | 3, 7          | 2.28          |

Table S3. The elemental analysis results of PEEK and SPEEK

| Sample | N (%) | C (%) | H (%) | S (%) | S / C* |
|--------|-------|-------|-------|-------|--------|
| PEEK   | 0.00  | 77.86 | 4.102 | 0.000 | /      |
| SPEEK  | 0.00  | 55.15 | 3.704 | 7.121 | 0.129  |

\*The sulfonated degree (n) is obtained by calculating the element ratio of C and S from the equation  $S / C = 32n / (12 \times 19)$ , where the molar masses of C, S are 12 g/mol and 32 g/mol, respectively.

Table S4. Proton conduction of SPEEK@PVA-1.7 in comparison with other high-performing SPEEK-based proton conductors

| SPEEK-based proton conductor                 | conductivity (mS cm <sup>-1</sup> ) | conditions      | Ref              |
|----------------------------------------------|-------------------------------------|-----------------|------------------|
| C-SPEEK/HPW/GO                               | 119.04                              | 80°C            | 7                |
| SiW <sub>9</sub> MoV <sub>2</sub> /rGO/SPEEK | 10.7                                | 16°C and 70% RH | 8                |
| SPEEK/CrPSSA 40 sIPN                         | 1                                   | 80°C and 25%RH  | 9                |
| SPEEK/SRGO-1.0                               | 8.6                                 | 80°C and 50% RH | 10               |
| SPEEK/ZCN-2.5                                | 50.24                               | 120°C and 30%RH | 11               |
| SPEEK/P@MWCNT                                | 64                                  | 25°C and 100%RH | 12               |
| SPEEK/HMN-6                                  | 70                                  | 25°C and 100%RH | 13               |
| SPEEK/P-C <sub>3</sub> N <sub>4</sub>        | 0.91                                | 20°C and 45%RH  | 14               |
| SPEEK/CeO <sub>2</sub> -ATiO <sub>2</sub>    | 17.06                               | 60°C and 20%RH  | 15               |
| SPEEK@PVA-1.7                                | 51.49                               | 25°C            | <b>This work</b> |
|                                              | 101.2                               | 70°C            | <b>This work</b> |



Table S5. A comparison of the Ni-PBA/SPEEK@PVA-1.7/MoO<sub>3</sub> cell with the representative proton batteries, in terms of energy density and cycling stability

| Cathode<br>Anode                                          | Electrolyte<br>(state)                                                                                                                       | Energy density *                                                                                                 | Cycling<br>stability                                  | Ref                  |
|-----------------------------------------------------------|----------------------------------------------------------------------------------------------------------------------------------------------|------------------------------------------------------------------------------------------------------------------|-------------------------------------------------------|----------------------|
| CuFe-TBA<br>MoO <sub>3</sub>                              | 9.5 M H <sub>3</sub> PO <sub>4</sub><br>(Liquid)                                                                                             | 49 mAh g <sup>-1</sup> and 44 mAh g <sup>-1</sup><br>(0.025 A g <sup>-1</sup> and 5 A g <sup>-1</sup> )          | 85% after 1000<br>cycles at 2 A g <sup>-1</sup>       | 2                    |
| Ni-PBA<br>MoO <sub>3</sub>                                | 1 M HCl+20 M ZnCl <sub>2</sub><br>(Liquid)                                                                                                   | 62 mAh g <sup>-1</sup> and 38 mAh g <sup>-1</sup><br>(0.5 A g <sup>-1</sup> and 1A g <sup>-1</sup> )             | 76.1% after 400<br>cycles at 1A g <sup>-1</sup>       | 16                   |
| In-HCF<br>DPPZ                                            | 0.05 M H <sub>2</sub> SO <sub>4</sub><br>(Liquid)                                                                                            | 39.7 mAh g <sup>-1</sup><br>(1 A g <sup>-1</sup> )                                                               | 76.1% after<br>3000 cycles at<br>6A g <sup>-1</sup>   | 17                   |
| PB<br>Ti <sub>3</sub> C <sub>2</sub> T <sub>x</sub> MXene | 1 M KNO <sub>3</sub> +10 mM HNO <sub>3</sub><br>(Liquid)                                                                                     | 45 mAh g <sup>-1</sup> and 21 mAh g <sup>-1</sup><br>(0.7 A g <sup>-1</sup> and 6.8 A g <sup>-1</sup> )          | 74% after 3000<br>cycles at 6.8 A<br>g <sup>-1</sup>  | 18                   |
| CuFe-TBA<br>WO <sub>3</sub>                               | 2 M H <sub>2</sub> SO <sub>4</sub><br>(Liquid)                                                                                               | 50 mAh g <sup>-1</sup><br>(0.6 A g <sup>-1</sup> )                                                               | 74% after 1000<br>cycles                              | 19                   |
| CuFe-TBA<br>MoO <sub>3</sub>                              | 1 M H <sub>3</sub> PO <sub>4</sub> in MeCN<br>(Liquid)                                                                                       | 48 mAh g <sup>-1</sup><br>(0.1 A g <sup>-1</sup> )                                                               | 48% after 100<br>cycles                               | 20                   |
| ZnFe-TBA<br>MoO <sub>3</sub>                              | 1 M H <sub>3</sub> PO <sub>4</sub> in MeCN<br>(Liquid)                                                                                       | 48 mAh g <sup>-1</sup><br>(0.1 A g <sup>-1</sup> )                                                               | 83% after<br>80 cycles                                | 20                   |
| CuFe-TBA<br>MoO <sub>3</sub>                              | [Zn <sub>3</sub> (H <sub>2</sub> PO <sub>4</sub> ) <sub>6</sub> (H <sub>2</sub> O) <sub>3</sub> ](1,2,<br>3- benzotriazole) glass<br>(Solid) | 55 mAh g <sup>-1</sup> and 12 mAh g <sup>-1</sup><br>(0.01 A g <sup>-1</sup> and 0.05 A g <sup>-1</sup> )        | -                                                     | 21                   |
| <b>Ni-PBA<br/>MoO<sub>3</sub></b>                         | <b>SPEEK@PVA Hydrogel<br/>(Quasi-solid)</b>                                                                                                  | <b>66.2 mAh g<sup>-1</sup> and 49.6<br/>mAh g<sup>-1</sup><br/>(0.1 A g<sup>-1</sup> and 1 A g<sup>-1</sup>)</b> | <b>77% after 500<br/>cycles at 1 A g<sup>-1</sup></b> | <b>This<br/>work</b> |

\*Energy density was based on the mass of the limiting electrode.

## References

- (1) Y. Yuan, D. Bin, X. Dong, Y. Wang, C. Wang and Y. Xia, *ACS Sustainable Chem. Eng.*, 2020, **8**, 3655-3663.
- (2) H. Jiang, W. Shin, L. Ma, J. J. Hong, Z. Wei, Y. Liu, S. Zhang, X. Wu, Y. Xu, Q. Guo, M. A. Subramanian, W. F. Stickle, T. Wu, J. Lu and X. Ji, *Adv. Energy Mater.*, 2020, **10**, 2000968.
- (3) W. Dai, Y. Shen, Z. Li, L. Yu, J. Xi and X. Qiu, *J. Mater. Chem. A*, 2014, **2**, 12423-12432.
- (4) Q. Xin, Z. Li, C. Li, S. Wang, Z. Jiang, H. Wu, Y. Zhang, J. Yang and X. Cao, *J. Mater. Chem. A*, 2015, **3**, 6629-6641.
- (5) P. Xing, G. P. Robertson, M. D. Guiver, S. D. Mikhailenko, K. Wang and S. Kaliaguine, *J. Membr. Sci.*, 2004, **229**, 95-106.
- (6) S. M. J. Zaidi, S. D. Mikhailenko, G. P. Robertson, M. D. Guiver and S. Kaliaguine, *J. Membr. Sci.*, 2000, **173**, 17-34.
- (7) F. Sun, L. L. Qin, J. Zhou, Y. K. Wang, J. Q. Rong, Y. J. Chen, S. Ayaz, Y. U. Hai-Yin and L. Liu, *J. Membr. Sci.*, 2020, **611**, 118381.
- (8) H. Wu, H. Cai, Y. Xu, Q. Wu and W. Yan, *Mater. Chem. Phys.*, 2018, **215**, 163-167.
- (9) X. Wu, G. He, X. Li, F. Nie, X. Yan, L. Yu and J. Benziger, *J. Power Sources*, 2014, **246**, 482-490.
- (10) X. Qiu, T. Dong, M. Ueda, X. Zhang and L. Wang, *J. Membr. Sci.*, 2017, **524**, 663-672.
- (11) H. Sun, B. Tang and P. Wu, *ACS Appl. Mater. Interfaces*, 2017, **9**, 35075-35085.
- (12) Z. Esmaeilzadeh, M. Karimi, A. M. Shoushtari and M. Javanbakht, *Polymer*, 2021, **230**, 124067.
- (13) S. Zhai, Z. Lu, Y. Ai, X. Liu, Q. Wang, J. Lin, S. He, M. Tian and L. Chen, *J. Membr. Sci.*, 2022, **645**, 120214.
- (14) S. Zhai, H. Song, X. Jia, K. Yang, M. Feng, S. He and J. Lin, *J. Power Sources*, 2021, **506**, 230195.
- (15) H. Ranganathan, M. Vinokhannan, A. R. Kim, V. Subramanian, M.-S. Oh and D. J. Yoo, *Int. J. Energy Res.*, 2022, **46**, 9041-9057.
- (16) B. Yang, T. Qin, Y. Du, Y. Zhang, J. Wang, T. Chen, M. Ge, D. Bin, C. Ge and H. Lu, *Chem. Commun.*, 2022, **58**, 1550.
- (17) J. Qiao, M. Qin, Y.-M. Shen, J. Cao, Z. Chen and J. Xu, *Chem. Commun.*, 2021, **57**, 4307.
- (18) Y. Zhu, Y. Lei, Z. Liu, Y. Yuan and H. N. Alshareef, *Nano Energy*, 2021, **81**, 105539.
- (19) X. Wu, J. J. Hong, W. Shin, L. Ma, T. Liu, X. Bi, Y. Yuan, Y. Qi, T. W. Surta, W. Huang, J. Neuefeind, T. Wu, P. A. Greaney, J. Lu and X. Ji, *Nat. Energy*, 2019, **4**, 123-130.
- (20) Y. Xu, X. Wu, H. Jiang, L. Tang, K. Y. Koga, C. Fang, J. Lu and X. Ji, *Angew. Chem. Int. Ed.*, 2020, **59**, 22007-22011.
- (21) N. Ma, S. Kosasang, A. Yoshida and S. Horike, *Chem. Sci.*, 2021, **12**, 5818.
